# Supplementary material for: Preliminary results in the analysis of the immune response after aneurysmal subarachnoid hemorrhage
Source: PubMed Central journal article supplement (PMC7367262; doi:10.1038/s41598-020-68861-y), 2020-07-16

## Preliminary Results In The Analysis Of The Immune Response After Aneurysmal Subarachnoid Hemorrhage

*Jorge A. Roa MD<sup>1,2</sup>, Deepon Sarkar BS<sup>1</sup>, Mario Zanaty MD<sup>2</sup>, Daizo Ishii MD<sup>2</sup>, Yongjun Lu PhD<sup>2</sup>, Nitin J. Karandikar MD PhD<sup>3</sup>, David M. Hasan MD<sup>2</sup>, Sterling B. Ortega PhD<sup>3</sup>, Edgar A. Samaniego MD, MS<sup>1, 2, 4</sup>*

- 1. Department of Neurology, University of Iowa Hospitals and Clinics, Iowa City, Iowa, USA.*
- 2. Department of Neurosurgery, University of Iowa Hospitals and Clinics, Iowa City, Iowa, USA.*
- 3. Department of Pathology, University of Iowa Hospitals and Clinics, Iowa City, Iowa, USA.*
- 4. Department of Radiology, University of Iowa Hospitals and Clinics, Iowa City, Iowa, USA.*

**Supplemental Figure 1.** Timeline for CSF and PB sample collection.

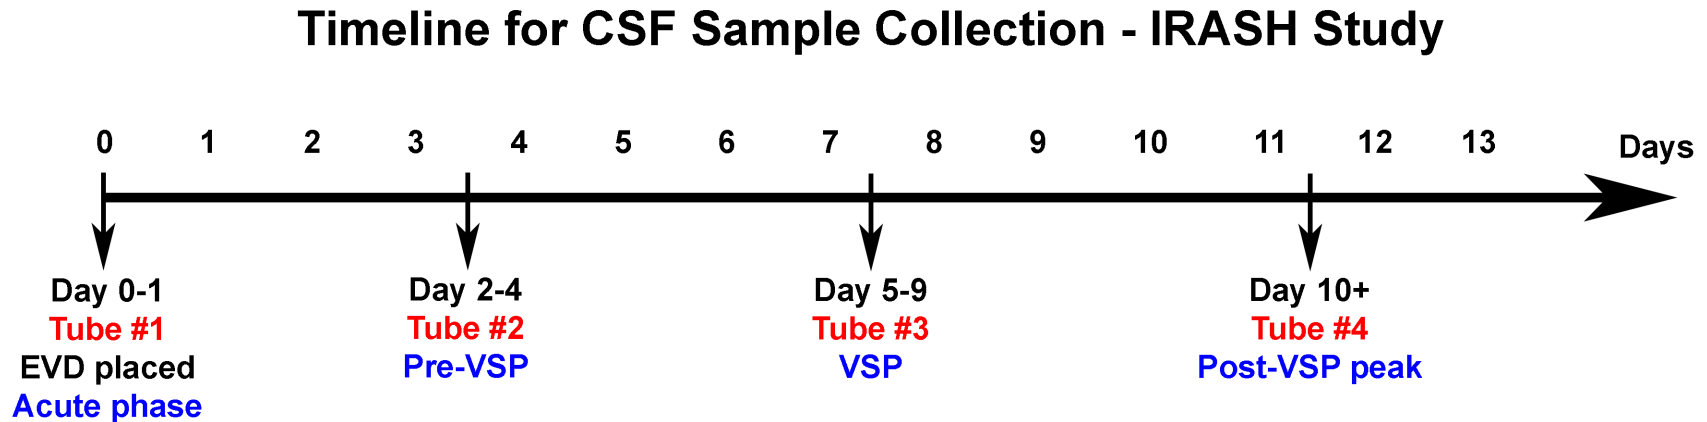

**Supplemental Figure 2.** Gating strategy used during flow cytometry.

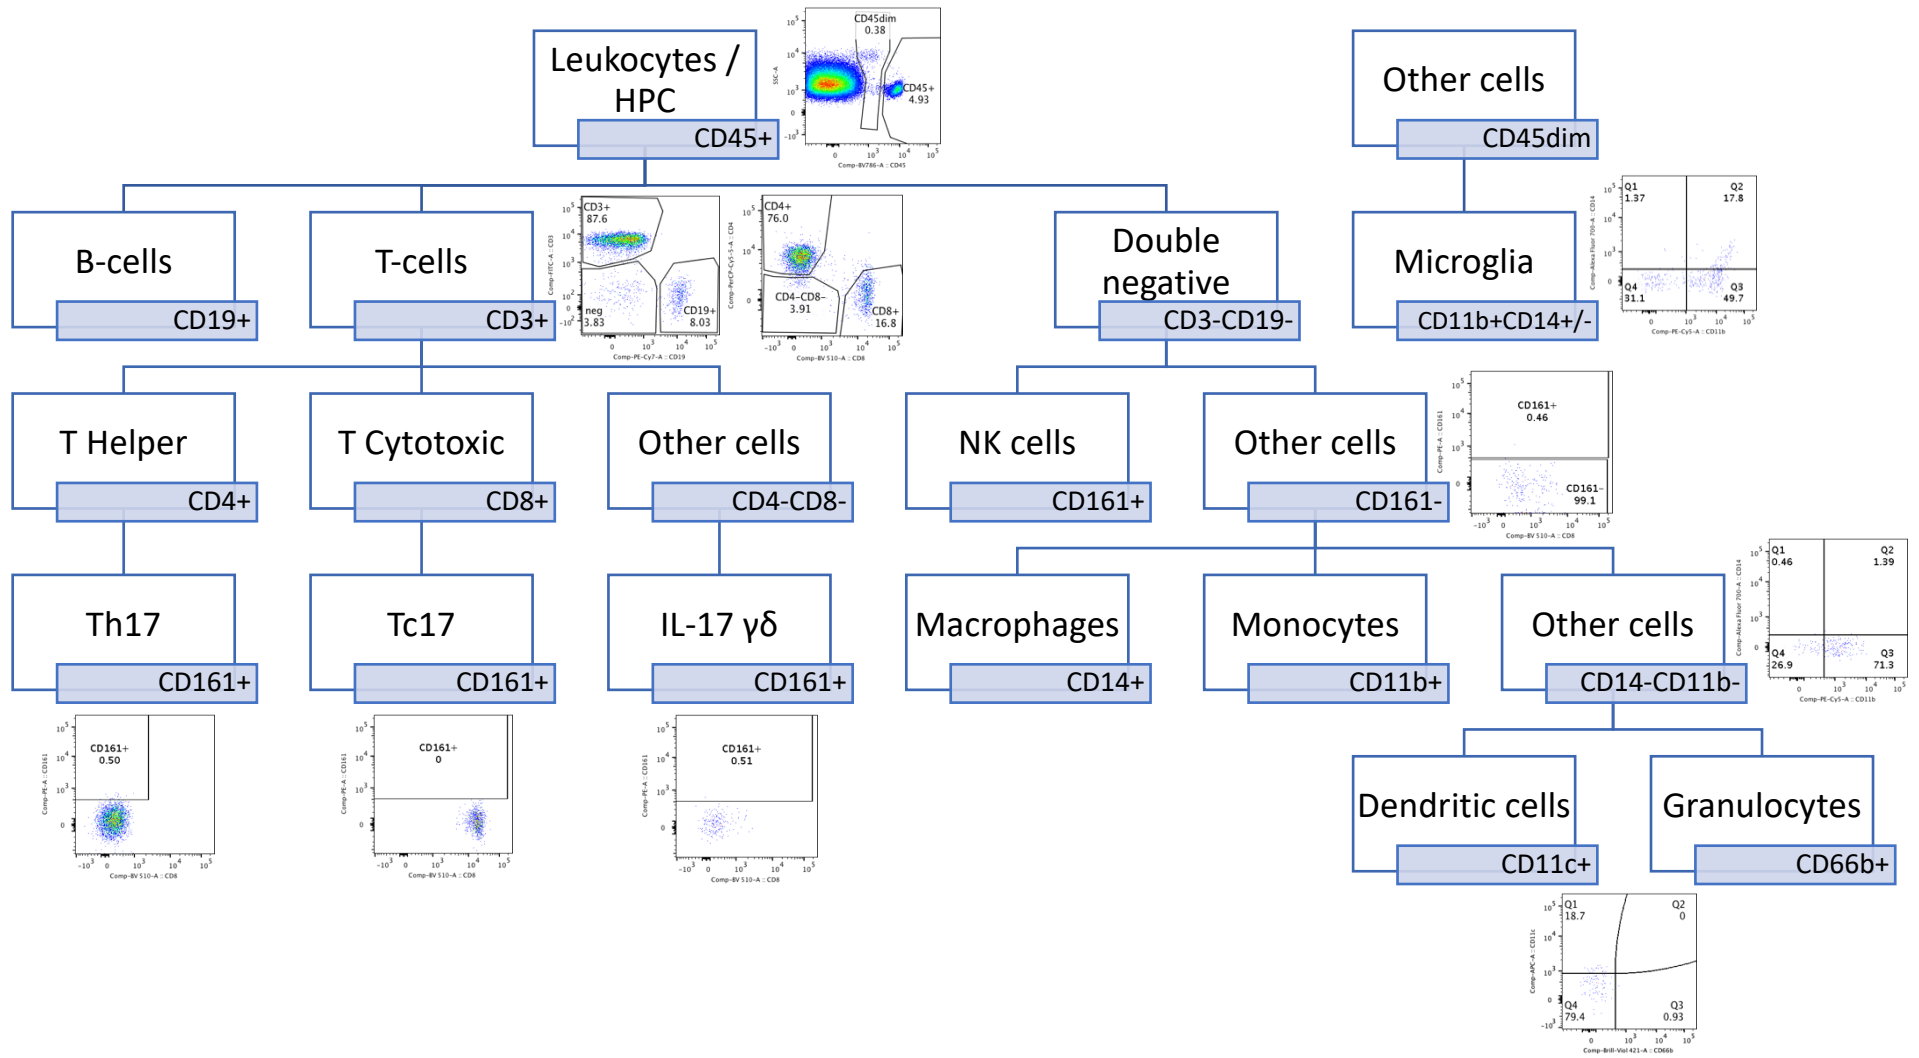

**Supplemental Figure 3.** PB CD45+ cellularity (A) among all patients and (B) categorized by presence of VSP.

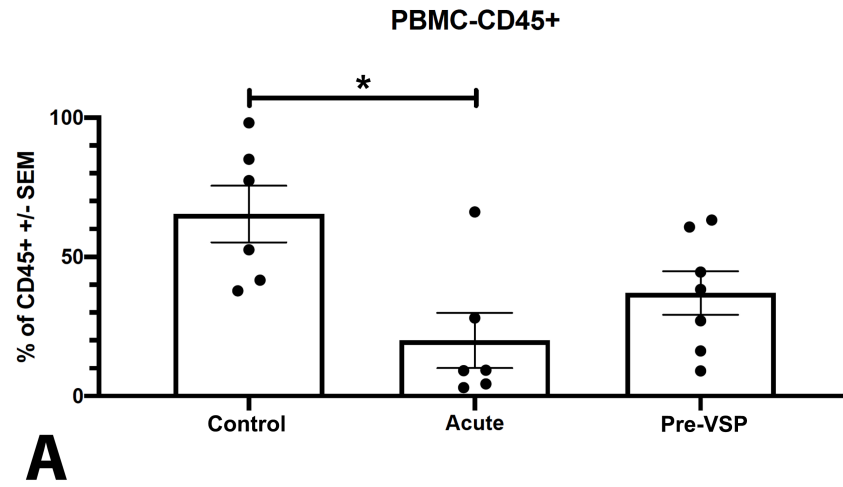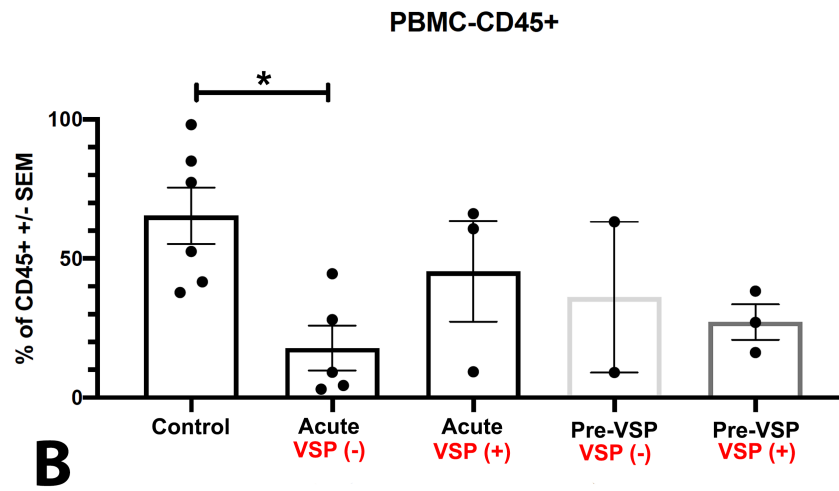

**Supplemental Figure 4.** ELISA results for expression of (A) VEGF among all patients, (B) VEGF categorized by presence of cVSP, and (C) MMP-9 among all patients.

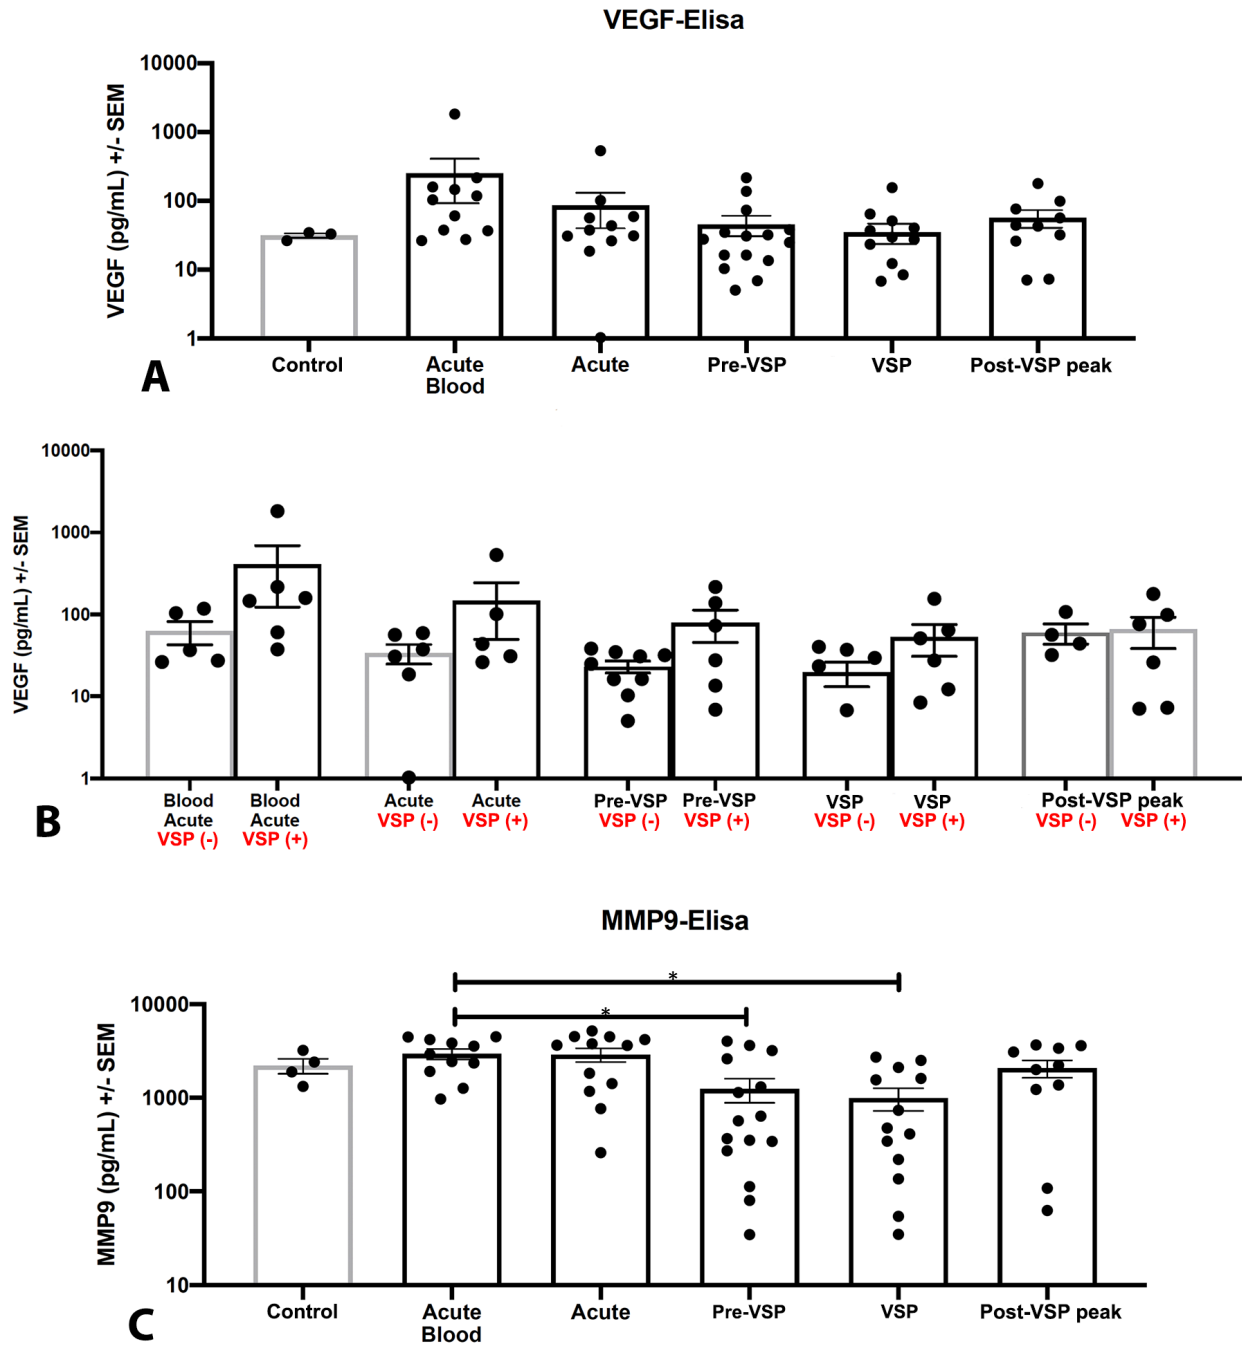

**Supplemental Figure 5.** ELISA results for expression of (A) IL-6 among all patients, (B) IL-6 categorized by presence of cVSP, and (C) TNF- $\alpha$  among all patients.

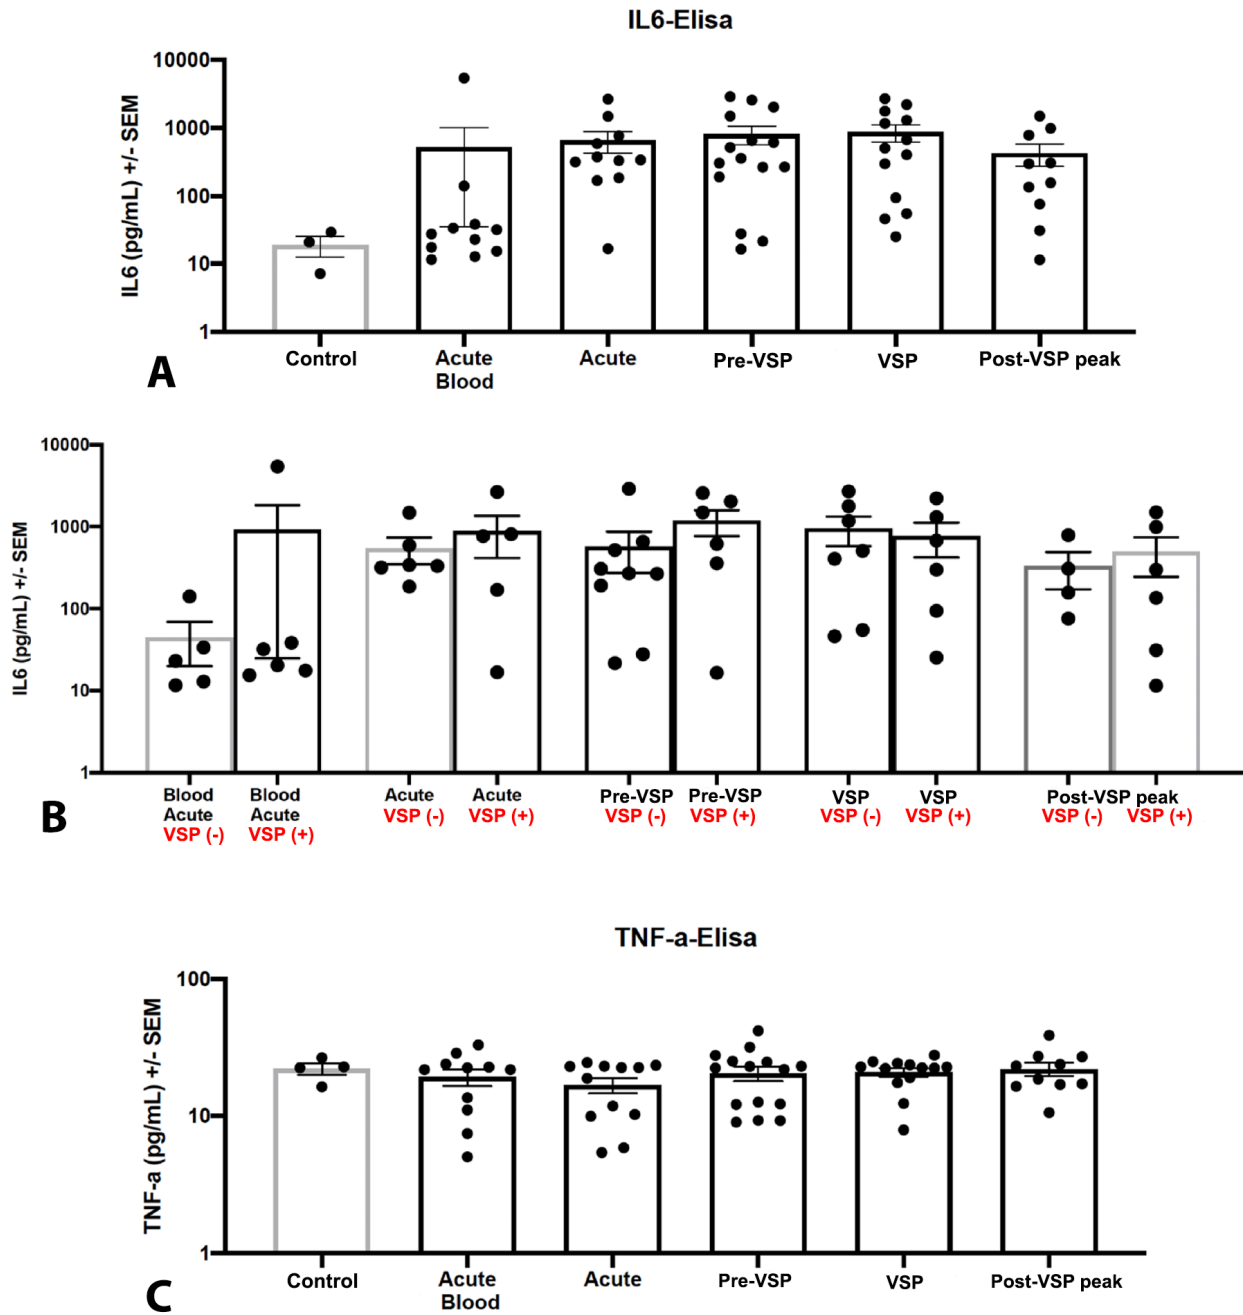

Supplement: 41598_2020_68861_MOESM1_ESM.pdf [file 41598_2020_68861_MOESM1_ESM.pdf]
